# Supplementary material for: Proteome-wide autoantibody screening and holistic autoantigenomic analysis unveil COVID-19 signature of autoantibody landscape
Source: bioRxiv or medRxiv preprint supplement (doi:10.1101/2024.06.07.24308592), 2025-03-14

**A** Sum of Autoantibody Levels by Sex: Male

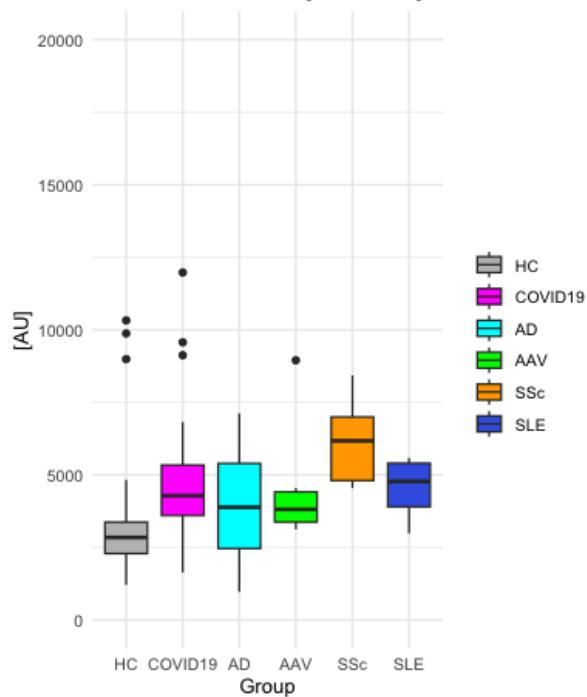

**B** Sum of Autoantibody Levels by Sex: Female

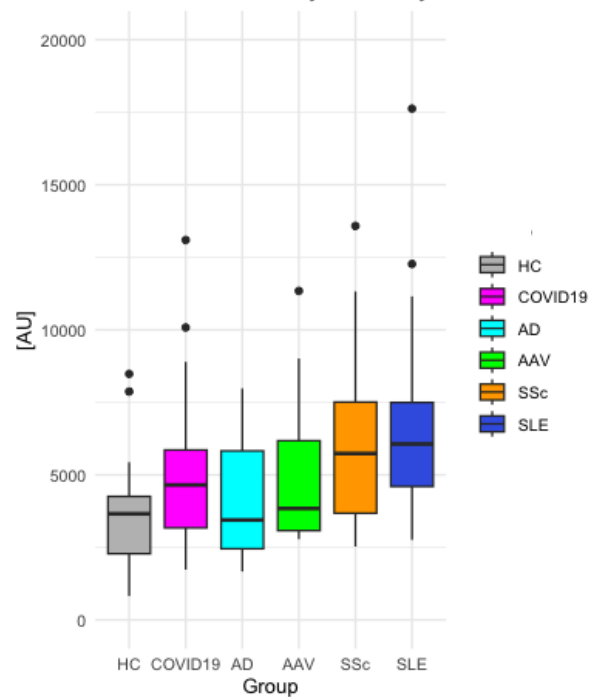

**C** Sum of Autoantibody Levels for Age < 50

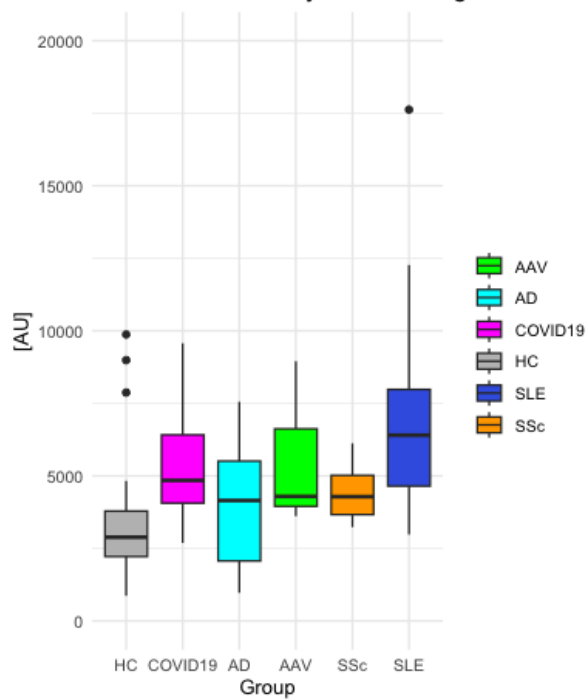

**D** Sum of Autoantibody Levels for Age >= 50

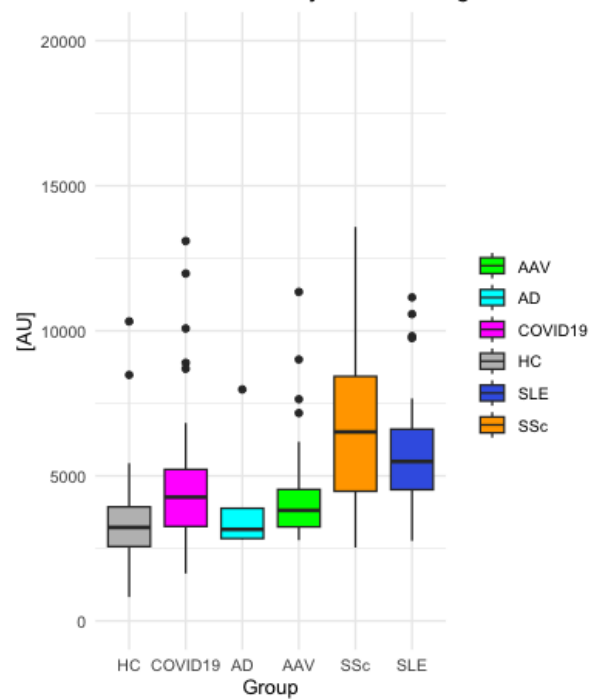

Supplement: Supplementary file [file media-6.pdf]
