# Supplementary material for: Proteome-wide autoantibody screening and holistic autoantigenomic analysis unveil COVID-19 signature of autoantibody landscape
Source: bioRxiv or medRxiv preprint supplement (doi:10.1101/2024.06.07.24308592), 2025-03-14
Supplement: Supplementary file [file media-8.pdf]

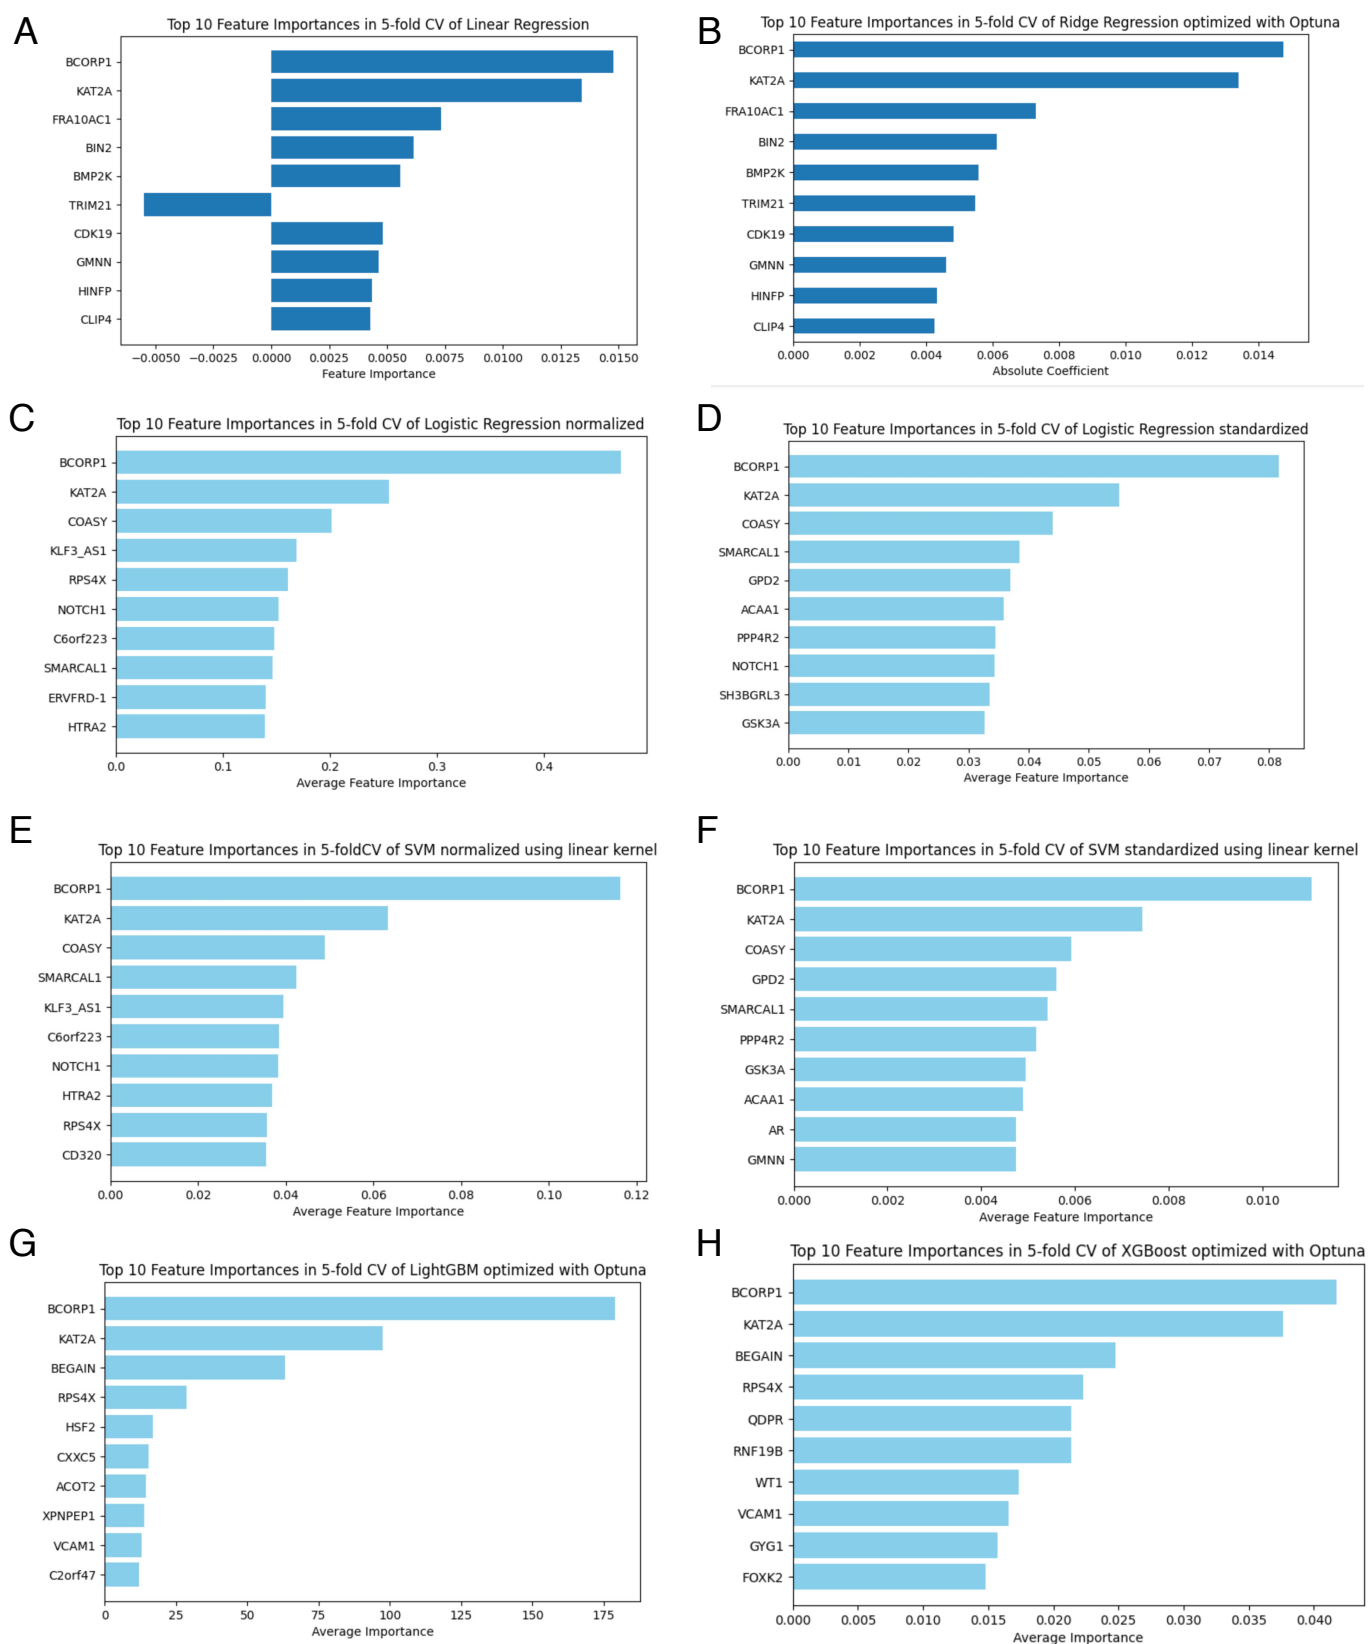

Matsuda KM et al.  
Supplementary Figure 3
